# Supplementary material for: Association of chrononutrition patterns with biological aging: evidence from a nationally representative cross-sectional study
Source: Royal Society of Chemistry journal article supplement (doi:10.1039/d4fo00147h), 2024-01-01
Supplement: d4fo00147h4.pdf [file d4fo00147h4.pdf]

ESI Table 1. Multivariate Linear Regression of Eating Frequency with Metabolic Characteristic

| Metabolic Characteristic         | n    | Beta | 95% CI <sup>1</sup> | p-value |
|----------------------------------|------|------|---------------------|---------|
| Visceral Adiposity Index (VAI)   | 7888 | 0.00 | -0.06, 0.06         | >0.9    |
| high-density lipoprotein(mmol/L) | 7888 | 0.00 | -0.01, 0.01         | >0.9    |
| triglyceride(mmol/L)             | 7888 | 0.00 | -0.03, 0.03         | 0.8     |
| Glycohemoglobin (%)              | 7888 | 0.01 | -0.01, 0.03         | 0.2     |

Age, gender, educational attainment, poverty to income ratio, race/ethnicity, BMI, waist circumference, alcohol use, smoking status, physical activity status, general health condition, history of CVD, history of stroke, history of cancer, history of diabetes, history of hypertension, history of trouble sleeping, and energy intake were adjusted in this model.
