# Supplementary figures and images for: Association of chrononutrition patterns with biological aging: evidence from a nationally representative cross-sectional study
Source: Royal Society of Chemistry journal article supplement (doi:10.1039/d4fo00147h), 2024-01-01

**A** Eating window

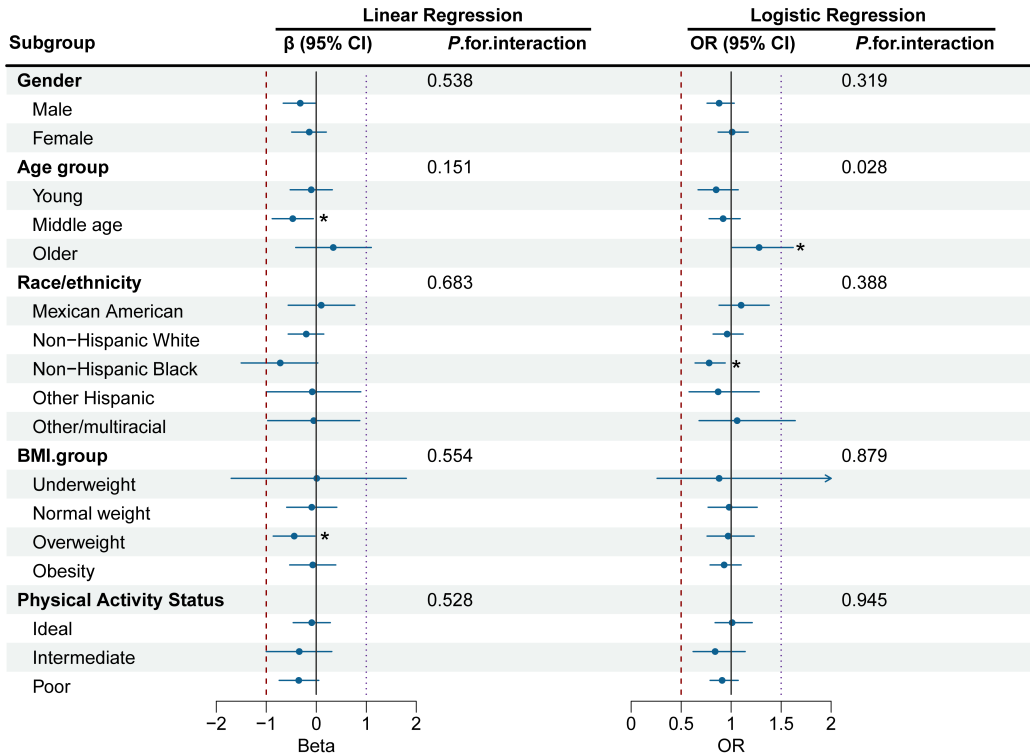

\*:*P* < 0.05

**B** Midpoint time of food/beverage intake

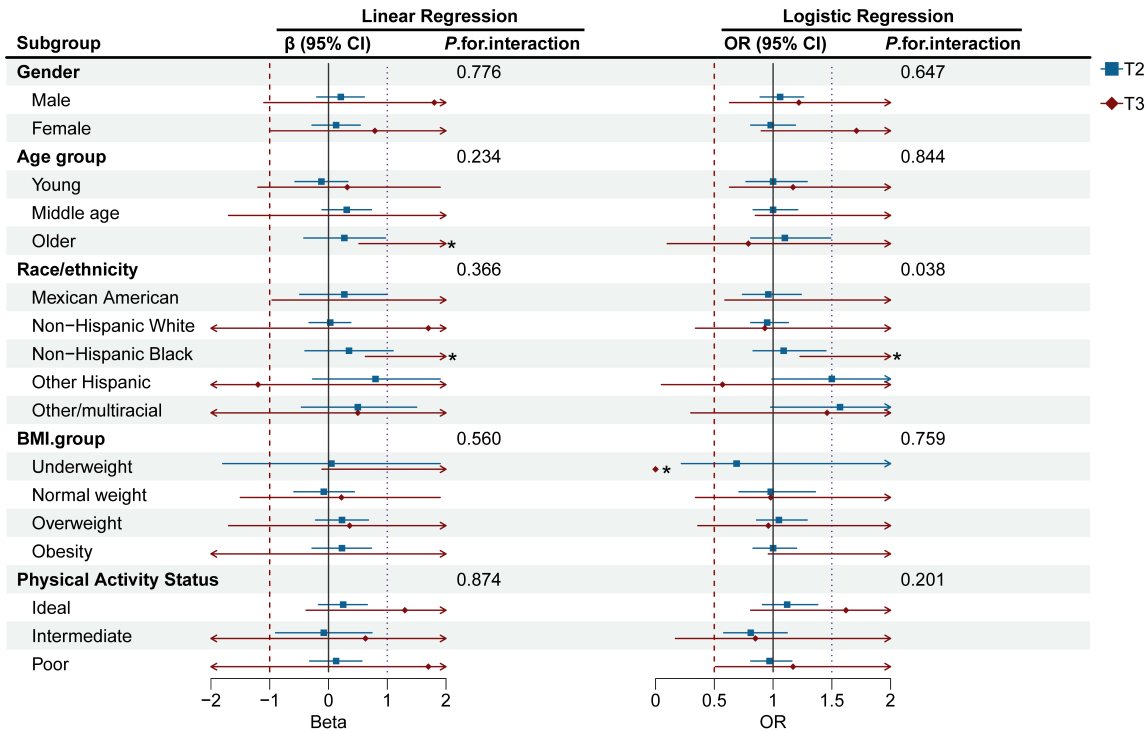

\*:*P* < 0.05

Supplement: d4fo00147h2.pdf [file d4fo00147h2.pdf]

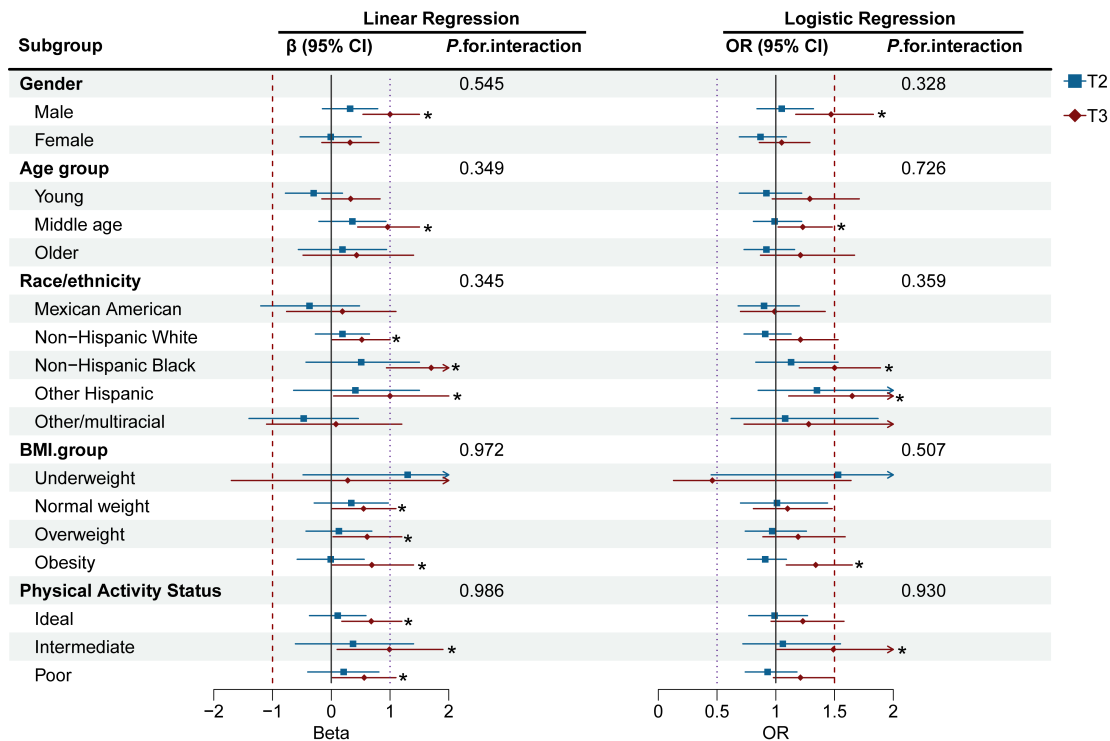

\*:*P* < 0.05

**B Last food/beverage intake**

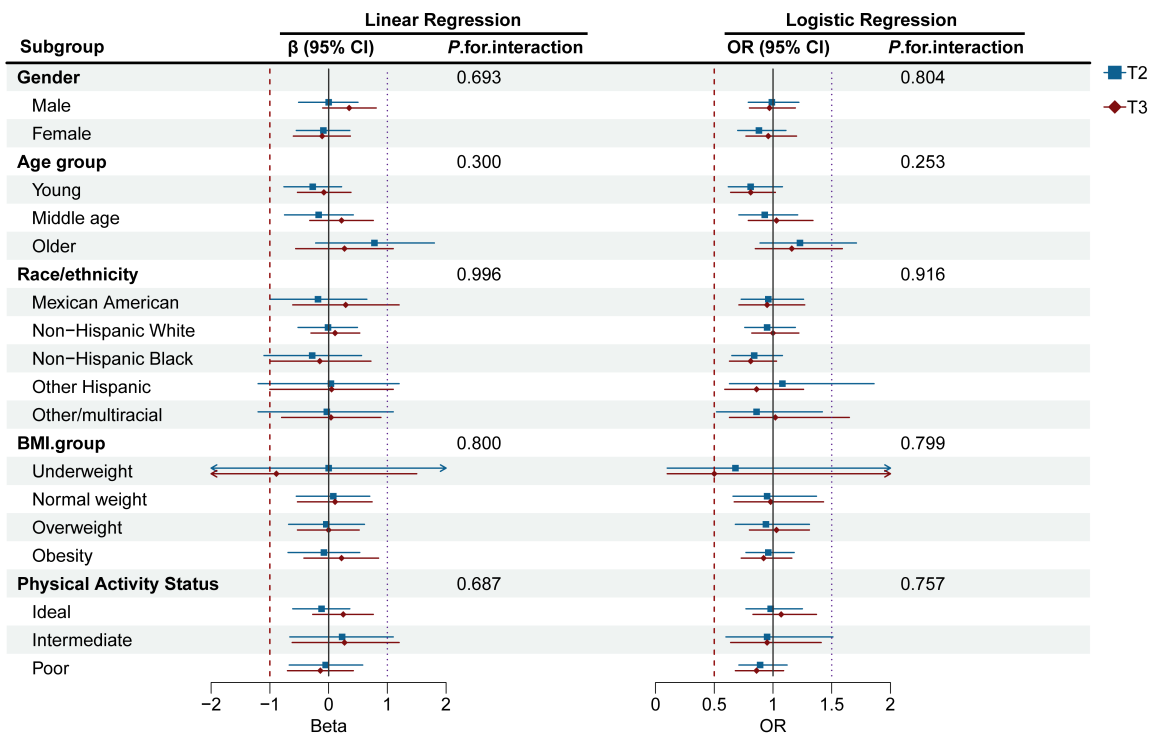

\*:*P* < 0.05

Supplement: d4fo00147h3.pdf [file d4fo00147h3.pdf]
